# Supplementary material for: Human NANOS1 Represses Apoptosis by Downregulating Pro-Apoptotic Genes in the Male Germ Cell Line
Source: PubMed Central journal article supplement (PMC7215683; doi:10.3390/ijms21083009), 2020-04-24
Supplement: ijms-21-03009-s001.pdf [file ijms-21-03009-s001.pdf]

**Supplementary Table S1.** List of primers used for RT-qPCR. For primers, F indicates forward and R – revers.

| Gene    | Primer | Sequence 5' → 3'              | Primer Length [nt] | Amplicon Length [nt] | Annealing Temperature [°C] |
|---------|--------|-------------------------------|--------------------|----------------------|----------------------------|
| BCL10   | F      | AATACCATCTTCTCTTCA            | 18                 | 91                   | 56 °C                      |
|         | R      | TTCCTTCTTCTTCTAACT            | 18                 |                      |                            |
| GADD45A | F      | GTGACGAATCCACATTCATCTC        | 22                 | 90                   | 56 °C                      |
|         | R      | CCATTGATCCATGTAGCGACTT        | 22                 |                      |                            |
| GADD45B | F      | AAGTTGATGAATGTGGAC            | 18                 | 135                  | 56 °C                      |
|         | R      | GATGTTGATGTCGTTGTC            | 18                 |                      |                            |
| GADD45G | F      | TCAGCCAAAGTCTTGAAC            | 18                 | 107                  | 56 °C                      |
|         | R      | ATCAGCGTAAAATGGATCT           | 19                 |                      |                            |
| JUN     | F      | ACGACCTTCTATGACGAT            | 18                 | 91                   | 56 °C                      |
|         | R      | TCTGTTTCAGGATCTTGG            | 18                 |                      |                            |
| RHOB    | F      | TGCTGATCGTGTTCAGTAAAG         | 20                 | 91                   | 56 °C                      |
|         | R      | TTGCCGTCCACCTCAATG            | 18                 |                      |                            |
| RIPK1   | F      | AGAGAAGTCGGATGTGTA            | 18                 | 98                   | 56 °C                      |
|         | R      | TTATCAACTGCTGCTCAC            | 18                 |                      |                            |
| STK17A  | F      | TGAACTAGCACAAGACAATCCT        | 22                 | 91                   | 56 °C                      |
|         | R      | AGCAGCATATTCCAGAACTAAGA       | 23                 |                      |                            |
| TP53BP2 | F      | ACCAGAGCAGTGAAGATA            | 18                 | 135                  | 56 °C                      |
|         | R      | CTGAAGGTGGCTGATTAG            | 18                 |                      |                            |
| SIAH1   | F      | CATCAGCATAAGTCCATTACAAC       | 23                 | 82                   | 56 °C                      |
|         | R      | CAACAGCACCAGGAAGATTA          | 20                 |                      |                            |
| ARNT    | F      | CCACAG-GAACTCTTAGGAA          | 19                 | 117                  | 56 °C                      |
|         | R      | CATGACAGACAGCACTTG            | 18                 |                      |                            |
| GAPDH   | F      | CGGAGTCAACGGATTGGTTCGTAT      | 24                 | 307                  | 56 °C                      |
|         | R      | AGCCTTCTCCATGGTGGTGAAGAC      | 24                 |                      |                            |
| RPL13   | F      | CCTGGAGGAGAAGGAGGGAAAGA<br>GA | 25                 | 102                  | 56 °C                      |
|         | R      | TTGAGGACCTCTGTGATTTGTCAA      | 25                 |                      |                            |
| UBC     | F      | ATTTGGTGCGCGTTCTTG            | 19                 | 114                  | 56 °C                      |
|         | R      | TGCCTTGACATTCTCGATGGT         | 21                 |                      |                            |
